# Supplementary material for: Assessing scale‐wise similarity of curves with a thick pen: As illustrated through comparisons of spectral irradiance
Source: PubMed Central journal article supplement (PMC6206219; doi:10.1002/ece3.4496), 2018-09-12
Supplement: ECE3-8-10206-s001.pdf [file ECE3-8-10206-s001.pdf]

1 Assessing scale-wise similarity of curves with a thick pen:  
2 as illustrated through comparisons of spectral irradiance

3 Saara M. Hartikainen<sup>1</sup>, Agnieszka Jach<sup>2</sup>, Aurea Grané<sup>3</sup>,

T. Matthew Robson<sup>1,\*</sup>

4 <sup>1</sup>*University of Helsinki, Viikki Plant Science Centre, PB 65, Helsinki, Finland;* <sup>2</sup>*Department of*  
5 *Finance and Statistics, Hanken School of Economics, PB 479, Helsinki, Finland;* <sup>3</sup>*Department of*  
6 *Statistics, Universidad Carlos III de Madrid, C/ Madrid, 126, Getafe, Spain*

## 7 **Appendix: Graphs**

---

\*Correspondence author. E-mail: [matthew.robson@helsinki.fi](mailto:matthew.robson@helsinki.fi)

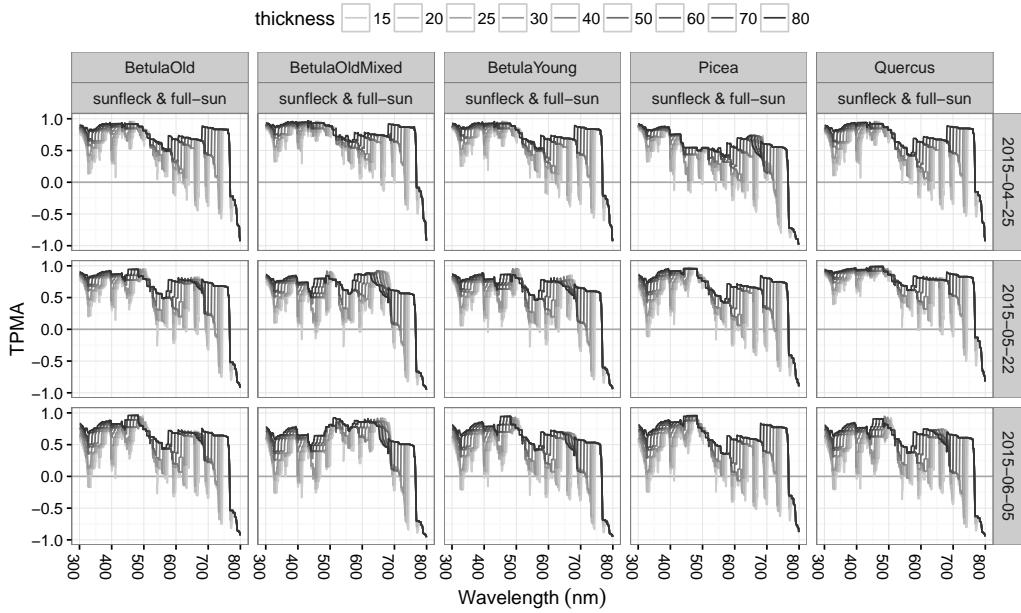

Figure A.1: TPMA for spectral irradiance from positions sunfleck and full-sun, for a given stand and for a given date.

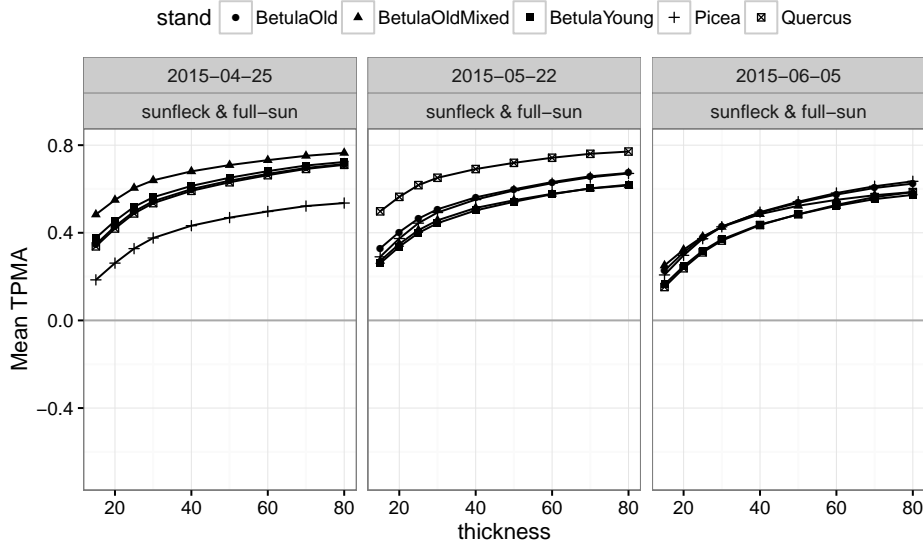

Figure A.2: TPMA for spectral irradiance from positions sunfleck and full-sun, averaged over wavelengths, for a given stand and for a given date.

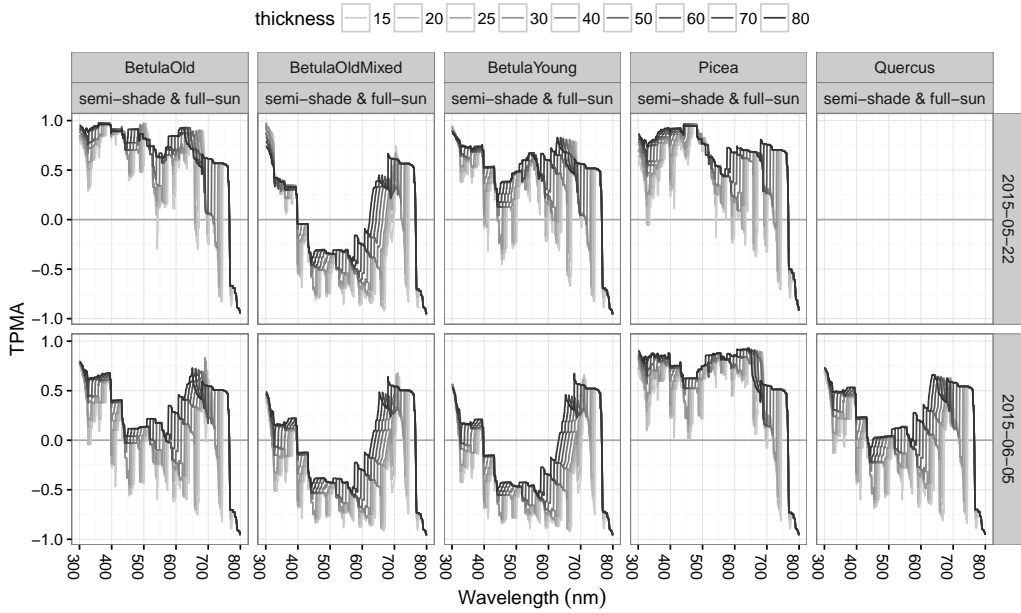

Figure A.3: TPMA for spectral irradiance from positions semi-shade and full-sun, for a given stand and for a given date. No data for semi-shade in Quercus.

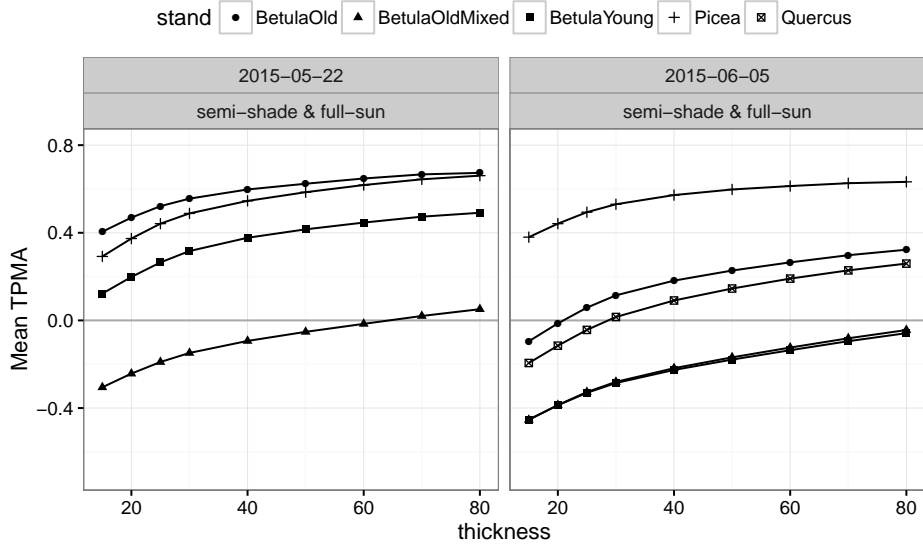

Figure A.4: TPMA for spectral irradiance from positions semi-shade and full-sun, averaged over wavelengths, for a given stand and for a given date.

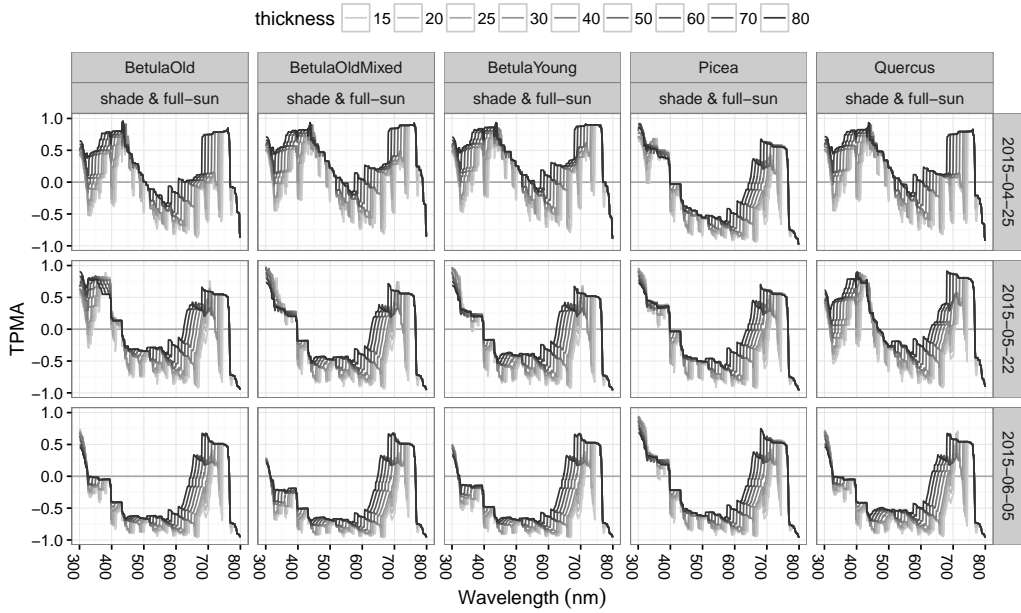

Figure A.5: TPMA for spectral irradiance from positions shade and full-sun, for a given stand and for a given date.

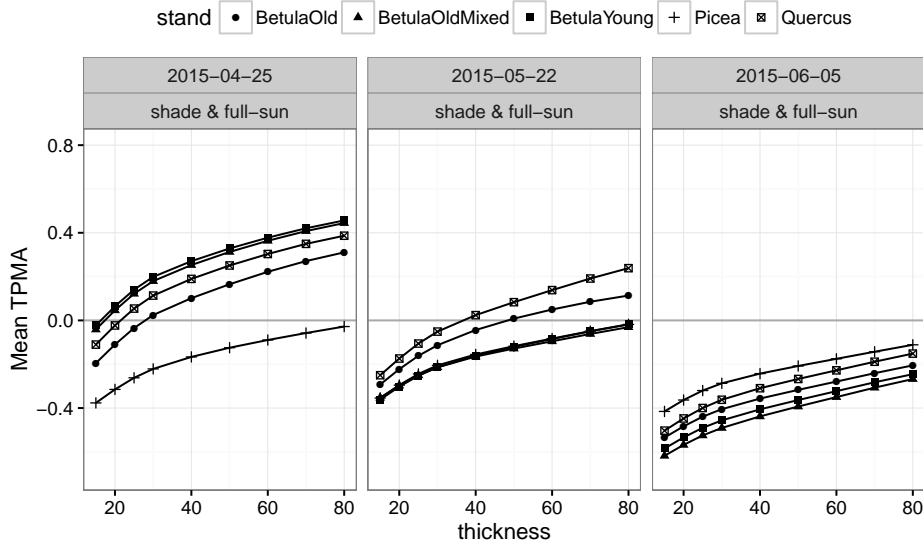

Figure A.6: TPMA for spectral irradiance from positions shade and full-sun, averaged over wavelengths, for a given stand and for a given date.
